# Supplementary material for: The Effectiveness, Impact, and Viability of Culinary Medicine in Medical Programs: A Systematic Review
Source: Research Square preprint supplement (doi:10.21203/rs.3.rs-1222179/v1), 2022-01-24
Supplement: Supplementary file 1 [file 307d6f5d881e72790e5f44b4.docx]

**Appendix 1 - Supplementary material**

| **Table A1** Study Descriptions | | | | | |
| --- | --- | --- | --- | --- | --- |
| **Authors** | **Study Design** | **Setting** | **Population** | **Aim(s) of research** | **Course Description** |
| Monlezun et al (2015) | Cross-Sectional | University Teaching Kitchen and various Community Centres | Medical students; n=627; Attrition NR; Any year. | To investigate superiority of "stimulation based medical education with deliberate practice" style hands-on cooking and nutrition education over traditional clinical education for preventive medicine in a large sample of medical students. | 8 session elective (28 hours total): consisting of PBLs and 0·5 hour pre-module video lecture, pre-module quizzes and quiz review; 1·5 hour hands-on cooking. Program continues into interdisciplinary seminars for Third year medical students and a four week away rotation for Fourth year students. |
| Dreibelbis & George (2017) | Qualitative | Senior Centre Teaching Kitchen | Medical students; n=4; Attrition=0%; 4th year. | To partner Penn State College of Medicine with a senior center and launch a pilot culinary medicine elective with a focus on involving older community residents as intergenerational mentors. | 8 session elective: (3 hours each) in a 2-week program consisting of in-person case-based discussions for 1 hour; collaborative cooking for 2 hours with elder mentor, pre-class readings, pre-session standardised quizzes and 2 hands-on culinary skills lessons with professional chef facilitator. |
| Jaroudi et al (2018) | Prospective Case Series | University Lecture Hall and University Cooking Lab | Medical students; n=20; Attrition=15%; 1st and 2nd year. | To develop and implement a culinary medicine elective into Texas Tech Universities Medical Program to equip students with confidence in knowledge and skills in culinary medicine concepts and to improve physician's integration of preventative medicine into patient care proficiency. | Elective course: duration or schedule NR; consisting of four didactic sessions and four interactive kitchen-based labs during the semester; delivered by local chefs, other medical students, and hospital dietitians. |
| Monlezun et al (2018) | Cross-Sectional | Varied Based on Institution | Medical students; n=3248; Attrition NR. | To determine if hands-on cooking and nutrition education for medical students can have inferred causality for improved student competencies and attitudes towards providing patients with nutrition education, students' own diet and if such a program could be scalable. | 8 session elective (22 hours total): consisting of 0·5 hour pre-class online lecture videos, a 1·5 hours hands-on cooking, and a 0·75 hour post-class PBL session; delivered through CHOP instructors (variable based on institution implanting the program. |
| Hauser et al (2019) | Qualitative | Offsite Commercial Kitchen | Medical students, Physician assistant students; n=36; Attrition NR; Any year. | To produce a Teaching Kitchen Elective for medical students that focuses on hands-on culinary techniques, dietary counselling for patients to overcome medical graduates' lack of confidence in nutrition counselling, self-care and culinary skills. | 8 session elective (2 hours each): consisting of weekly pre-class videos and handouts; hands-on culinary skills lessons, case-based round table group discussions and recipe-based assignments; delivered by 2 physician-chefs, an executive chef, external professors specialising in medical education, nutrition and prevention research and a variety of specialty faculty members faculty members. |
| Lawrence et al (2019) | Prospective Case Series | University Food Lab | Medical students, nutrition students, and medical residents; n=48; Attrition=27%. | To use a culinary medicine course to strengthen teamwork between nutrition and medical students using a collaborative environment to develop better understanding of their respective scopes of practice and establishing groundwork for effective interprofessional communication. | 25 hour nutrition elective: consisting of 5 sessions per semester, using 5 modules from Goldring Center for Culinary Medicine at Tulane University: includes online didactic components, and 3 hour in person interactive team component; taught by interdisciplinary faculty members, chef/dietitian, clinical dietitian, and family medicine physician. |
| Pang et al (2019) | Qualitative | Non-Profit Teaching Kitchens | Medical students; n=15 (2016), n=16 (2017), n=16 (2018); Attrition for all years = 0%; 2nd year; | 1) To develop a hands-on approach to medical nutrition education centred around teamwork;  2) To create innovative ways with food and cooking for students to connect with and understand health disparities faced in a county community population  3) To increase medical students confidence counseling patients with chronic disease to make dietary change. | 6 session elective (15 hours total): consisting of 0·5 hours of physiology and nutrition lessons, 1·5 hours of hands-on cooking class, and 0·5 hours of communal eating and session debrief; delivered by collaboration between a physician, a registered dietitian, and a chef. |
| Ring et al (2019) | Case Study | Non-Profit Teaching Kitchen and Chicago Public Schools | Medical students; n=9 (cohort 1), n=12 (cohort 2); Attrition = 11% (cohort 1), Attrition = 0% (cohort 2); 1st and 2nd year. | 1) To evaluate the feasibility and acceptability of the culinary medicine elective by examining class attendance rates, retention, and qualitative and quantitative feedback about the course. 2) To examine preliminary efﬁcacy of the elective in preparing medical students to counsel patients in successful behaviour change in nutrition and cooking,  3) To improve medical students’ own cooking and nutrition conﬁdence, attitudes, and behaviours. | Cohort 1: 6 elective in-class sessions facilitated by faculty and chef (~2·5 hours each): consisting of didactic teaching, counselling and motivational interviewing practice, culinary instruction and group dinner (hours NR); PLUS post-hoc 4 session service component (duration NR) teaching elementary public-school children.; Cohort 2: 6 session elective facilitated by faculty and chef: consisting of pre-class videos (3-8 minutes), lecture and assignment (totalling 1-1·5 hours) in-class simulated patient coaching, student-led research discussions, culinary sessions (hours NR); PLUS concurrent service component 4 sessions (duration NR) teaching elementary public-school children. |
| Hennrikus et al (2020) | Qualitative | University Lecture Hall | Medical students; n=380; Attrition NR; 1st year. | To vertically integrate basic science metabolic and immunologic pathways with clinical disease using nutrition in a constructivist educational model. | 13-week non-elective basic science course consisting of lectures, PBL, simulation sessions, review sessions and patient encounters culminating in competitive "cook off" where PBL groups prepared dishes for 1 of 5 specific disorders based on previous PBL cases. |
| Patnaik et al (2020) | Cross-Sectional | University Teaching Kitchen | Medical students; n=4125; Attrition NR. | To determine differences in efficacy between University of Texas Health Sciences Center implementation of practical culinary and nutrition curriculum compared to other participating CHOP schools. | 8 session elective (28 hours total): consisting of 0·5 hours pre-class lecture video, 0·5 hours of case-based learning, 1·5 hours of hands-on cooking, 0·75 hours post class PBL session. |
| Razavi et al (2020) | Cross-Sectional | Varied Based on Institution | Medical students; n=4215; Attrition NR. | To assess the association between participation in kitchen-based nutrition education and Mediterranean dietary intake among medical students. | 8 session elective (32 hours total): consisting of 4 hour modules divided into 1 hour online didactic program, 1·5 hours in-kitchen team-based case studies and nutrition discussion, 1·5 hours of hands-on cooking facilitated by physicians, chefs, and dietitians. |
| Rothman et al (2020) | Mixed methods | Clinic-Based Teaching Kitchen and West Philadelphia High Schools | Medical students; n=31; Attrition n=3%; 4th year. | To report initial outcomes of a pilot nutrition and culinary medicine course targeting post-clerkship | 8 session elective (2 hours each) taught by a chef instructor, dietitians, physicians, and patients: consisting of briefing on relevant nutrition science (5 minute), culinary instruction and demonstration by a chef (75 minutes), case discussion during eating of a meal (30 minutes), a concluding debrief of the session (10 minutes) and a capstone project involving food planning for mock patient and presentation. Additional service component included 8, weekly sessions teaching disease prevention practical nutrition to high school students (hours NR). |
| n=Sample population; NR=Not reported; CHOP=Cooking Through Health Optimisation; PBL = Peer-based learning | | | | | |
|  |  |  |  |  |  |

| **Table A2** Study Summaries | | |
| --- | --- | --- |
| **Authors** | **Outcome measures** | **Notable Findings** |
| Monlezun et al (2015) | **Quantitative**: Student diet and attitudes and competencies counselling patients on nutrition were compared using conditional multivariate logistic regression, as well as propensity score-weighted, and longitudinal panel analyses using 4 sets of the same 59 question survey. | After fully adjusted conditional multivariate logistic regression, Tulane University’s CHOP significantly increased the pooled odds of total proficiency in overall competencies by 72% when compared to traditional clinical education (OR=1·72, 95% CI: 1·54-1·92, p<0·001). |
| Dreibelbis & George (2017) | **Qualitative**: Observations by researchers evaluating the interactions and experiences of students and elders, post-intervention written self-reflections by students and elders participating in the course. | Participants shared the perception that elders had been able to successfully impart their lived experience and developed an understanding of the logistical and economic challenges patients face while making nutritional choices. |
| Jaroudi et al (2018) | **Quantitative**: Pre- and post-course Likert-scale surveys of culinary skill, knowledge of ingredients, knowledge of cooking techniques and ability to use kitchen supplies. Analysed using Mann-Whitney U test. A second pre- and post- course Likert scale survey and open-ended questions to assess nutrition knowledge and confidence, cooking habits, and factors that contribute to success of physician in promoting lifestyle changes. Analysed using Mann-Whitney U test. | There was a significant increase in students’ confidence in overall culinary skill level, knowledge of ingredients, knowledge of cooking techniques, and ability to use kitchen supplies (P=0·002, 0·002, 0·0004, and 0·003, respectively). |
| Monlezun et al (2018) | **Qualitative**: Propensity score-adjusted multilevel mixed effects multivariable regression showing medical students' improved competencies across 25 topics: All results are reported as fully adjusted Odds-Ratios. Analysed using two-tailed *P* value. | Report of multi-site CHOP trial shows highest power study on culinary medicine program efficacy currently, with 4026 completed surveys across more than 45 medical schools indicating good generalisability. Significant improvements were seen for participants in all aspects of nutritional counseling competency and attitudes towards positive impact of nutritional counseling in clinical practice. |
| Hauser et al (2019) | **Qualitative**: Pre- and post-course surveys evaluating attitudes, knowledge and behaviours about healthy cooking, eating, motivational interviewing of patients focusing on making dietary behaviour changes, and general course feedback. Data and analysis not reported. | Survey data and analysis were not presented in article. Authors suggest that preliminary findings indicate practical instruction of nutritional education is superior to traditional methods for teaching nutritional counselling. |
| Lawrence et al (2019) | **Quantitative**: Pre- and post-course surveys including team performance scale (TPS) (evaluating quality of team interactions) and 6-point Likert scale to rate frequency of participants engagement in each team-building process. Analysed using paired t test. | Despite high pre-course TPS scores, post-course TPS scores for the entire group, medical students and residents, and nutrition students were significantly higher (t=-4·79, P<0·001; t=-4·15, P=0·001; and t=-2·71, P=0·02, respectively). |
| Pang et al (2019) | **Qualitative**: Pre- and post- survey assessing students' knowledge in nutrition, ability to identify various foods by visual inspection, and confidence in cooking and nutritional counselling. Additionally, students provided course feedback on ways to improve the course and rated overall satisfaction with the class. Wilcoxon Signed Rank test used to analyse survey results. | Among the three cohorts, all students self-perceived nutrition knowledge and confidence scores increased significantly. Students self-perceived food identification scores increased significantly in 2017 and 2018 only. Students rated overall course satisfaction at 4·87/5, 5/5 and 5/5 for 2016, 2017 and 2018 intakes, respectively. |
| Ring et al (2019) | **Quantitative**: Pre- and post-course survey on self-perceived competency in nutritional counseling using Conner and colleagues, Perceived Competency in Obesity Counselling Scale (PCOC), attitudes toward nutrition in patient care using Nutrition in Patient Care Survey (NIPS), cooking confidence using "The Cooking with the Chef Evaluation Instrument" (Cohort 1), and Cooking and Food Skills Measure (Cohort 1), and personal dietary habits using PrimeScreen Dietary Screening Tool. Post-course only, survey on likelihood of course recommendation. Analysed using ANOVA and Bonferroni corrections, calculations of mean, standard deviation, confidence interval and P-value of changes over time.  **Qualitative**: Open ended questions with prompts. | Across two pilot cohorts, retention rates and attendance rates were more than 89% and 96% respectively, with mean recommendation scores of 6·25 and 6·67 out of 7, indicating good feasibility and acceptability. Notable methodologies include use of peer-reviewed competency scales for participants self-evaluations. Significant improvements in students’ counseling competencies in nutrition and obesity reported. No significant or mixed results reported for attitudes to nutrition counselling, culinary techniques and personal dietary habits. |
| Hennrikus et al (2020) | **Qualitative**: Post-course evaluation of strengths and weaknesses of individual classes and the course, using open-ended, free text, voluntary responses. Thematic analysis of qualitative data using grounded theory: data managed using ATLAS.ti 8.0 software. | Qualitative results described three major themes: increased relevance of basic science to real life, increased empathy towards complying with dietary restrictions, and increased student group cohesiveness. |
| Patnaik et al (2020) | **Quantitative**: Validated Likert scale-based, voluntary survey, assessing competency of medical students in 25 nutrition topics, their own dietary consumption habits (including food groups, diets and a validated Med-diet score), and beliefs regarding value of nutrition counseling. Analysed using propensity score–weighted logistic regression models with reported odds ratios and two-tailed p-values. | Within the multi-site trial using CHOP, University of Texas Health Sciences Center students were significantly more likely to strongly agree nutrition assessment should be routine clinical practice and that providers can improve patients’ health with nutrition education but displayed non-significant results in 12 of the 25 nutrition competency topics. |
| Razavi et al (2020) | **Quantitative**: Validated Likert scale-based, voluntary survey assessing the competency of medical students in 25 nutrition topics, students' dietary consumption habits (including food groups, diets and a validated Med-diet score), and beliefs regarding the value of nutrition counselling. Analysed using propensity score–weighted logistic regression models with reported odds ratios and two-tailed p-values | CHOP participants were at least twice as likely to adhere to Med-diet guidelines involving monounsaturated fats (P=0·009), fruit (P=0·019), vegetables (P<0·001) and legumes (P<0·001), and six times as likely to master Mediterranean diet principles competency. |
| Rothman et al (2020) | **Quantitative**: Pre- and post-course surveys of students’ self-perceived nutrition knowledge, confidence in counseling patients in management of diet-associated disease, and personal dietary/food choices. Analysed using calculations of means, standard deviations and two-tailed paired t-tests. **Qualitative**: Open-ended questions for feedback about the course. | The culinary medicine course for final year students, significantly improved competencies in all aspects of nutrition counselling. No significant improvements found in self-perceived value of nutrition counseling and mixed results reported for personal dietary habits. |
| CHOP=Cooking Through Health Optimisation; OR=Odds ratio; CI=Confidence interval; P=*P* value; t=T-test value; Med-diet= Mediterranean diet | | |

**Appendix 2 – Search strings entered for individual databases**

**SAGE:**

[[All "culinary medicine"] OR [All "nutritional medicine"] OR [All "culinary education"] OR [All "food as medicine"]] AND [All medical] AND [[All training] OR [All education] OR [All program]]

**Taylor and Francis:**

("Culinary Medicine" OR "Nutritional Medicine" OR "Culinary Education" OR "Food as medicine") AND (medical) AND (Student OR program OR education OR training)

**Science Direct:**

("Culinary Medicine" OR "Nutritional Medicine" OR "Culinary Education" OR "Food as medicine") AND (medical) AND (Student OR program OR education OR training)

**MEDLINE:**

("Culinary Medicine" OR "Nutritional Medicine" OR "Culinary Education" OR "Food as medicine") AND (medical) AND (Student OR program OR education OR training)

**Web of science:**

("Culinary Medicine" OR "Nutritional Medicine" OR "Culinary Education" OR "Food as medicine") AND (medical) AND (Student OR program OR education OR training)

**SCOPUS:**

("Culinary Medicine" OR "Nutritional Medicine" OR "Culinary Education" OR "Food as medicine") AND (medical) AND (Student OR program OR education OR training)
